# Supplementary material
Source: PubMed Central journal article supplement (PMC6706081)
Supplement: NIHMS1515279-supplement-1.pdf [file NIHMS1515279-supplement-1.pdf]

LINKS BETWEEN P AND G FACTORS

Table S1

*Description, Sample Items, and Item Reliability for Cognitive and Psychomotor Measures in the Texas “Tiny” Twin Project*

| Domain                       | Description                                                                         | Sample Items - TXtT                                                                                                                                                                                                                                                                                                                                                                 | Reliability -TXtT           | Task Description -ECLS-B                                                                                                                      | Reliability-ECLS-B         |
|------------------------------|-------------------------------------------------------------------------------------|-------------------------------------------------------------------------------------------------------------------------------------------------------------------------------------------------------------------------------------------------------------------------------------------------------------------------------------------------------------------------------------|-----------------------------|-----------------------------------------------------------------------------------------------------------------------------------------------|----------------------------|
| Communication /Oral Language | Expressive and receptive languages/Ability to construct grammatically correct story | <i>Does your baby make sounds like "da," "ga," "ka," and "ba"?</i> – For children aged 5-10 months<br><i>Does your child use endings of words, such as "-s," "-ed," and "-ing"?</i> For example, <i>does your child say things like, "I see two cats," "I am playing," or "I kicked the ball"?</i> – For children aged 39-56 months                                                 | .99 <sup>a</sup> (55 items) | Child was told a story by a trained coder using a series of pictures and subsequently asked to retell the story                               | N/A (1 score)              |
| Gross Motor                  | Coordination of large muscle groups                                                 | <i>While your baby is on his back, does s/he wave his/her arms and legs, wiggle, and squirm?</i> – For children aged 1-2 months<br><i>Does your child skip using alternating feet?</i> – For children aged 57-71 months                                                                                                                                                             | .99 <sup>a</sup> (47 items) | Child caught a bean bag, balance on one foot (right and left; 10 seconds), hop on one foot (right and left; 5 hops), skip, and walk backwards | .75 (7 items) <sup>b</sup> |
| Fine Motor                   | Coordination of small muscle groups                                                 | <i>Does your baby grab or scratch his/her fingers on a surface in front of him/her, either while being held in a sitting position or when s/he is on his/her tummy?</i> – For children aged 3-4 months<br><i>Using child-safe scissors, does your child cut a paper in half on a more or less straight line, making the blades go up and down?</i> – For children aged 45-50 months | .98 <sup>a</sup> (50 items) | Child instructed to replicate a drawing of a square, triangle, and asterisk<br>Child asked to build a gate using five wooden blocks           | .72 (4 items) <sup>b</sup> |

LINKS BETWEEN *P* AND *G* FACTORS

40

|                          |                                                                  |                                                                                                                                                                                                                                                                                                                                                                                                                                                   |                             |                                                                                                         |                                                                      |
|--------------------------|------------------------------------------------------------------|---------------------------------------------------------------------------------------------------------------------------------------------------------------------------------------------------------------------------------------------------------------------------------------------------------------------------------------------------------------------------------------------------------------------------------------------------|-----------------------------|---------------------------------------------------------------------------------------------------------|----------------------------------------------------------------------|
| Problem<br>-Solving/Math | Learning and<br>using logic<br>and rules to<br>solve<br>problems | <i>After watching you hide a small toy under a piece of paper or cloth, does your baby find it? (Be sure the toy is completely hidden.)</i> – For children aged 9-14 months<br><i>After a crumb or Cheerio is dropped into a small, clear bottle, does your child turn the bottle upside down to dump out the crumb or Cheerio? (Do not show him/her how.) (You can use a soda-pop bottle or a baby bottle.)</i> – For children aged 21-25 months | .98 <sup>a</sup> (53 items) | Items measured number sense, operations, probability, geometry, and pattern recognition                 | .89 (45 items; wave 3)<br>.92 (58 items; waves 4 and 5) <sup>a</sup> |
| Personal<br>-Social      | Self-awareness, self-care, and everyday function                 | <i>When in front of a large mirror, does your baby reach out to pat the mirror?</i> – For children aged 5-8 months<br><i>Does your child dress or undress him- or her- self without help (except for snaps, buttons, and zippers)?</i> – For children aged 45-50 months                                                                                                                                                                           | .98 <sup>a</sup> (52 items) | N/A                                                                                                     | N/A                                                                  |
| Reading                  | Receptive language, vocabulary, literacy                         | N/A                                                                                                                                                                                                                                                                                                                                                                                                                                               | N/A                         | Recognition of simple words, word matching, providing an initial assessment of the story the child read | .84 (85 items; wave 3)<br>.92 (85 items; waves 4 and 5) <sup>a</sup> |

*Note.* <sup>a</sup> 1PL IRT item reliability estimate, with number of items analyzed followed in parentheses. <sup>b</sup> Reliability estimate obtained using

Cronbach's alpha.

LINKS BETWEEN P AND G FACTORS

Table S2  
*Description, Sample Items, and Item Reliability for Psychopathology in the Texas “Tiny” Twin Project*

| Domain                          | Description                                                                                                   | Sample Items - TXtT                                                                                                                                                                                                                                            | Item Reliability - TXtT     | Sample Items – ECLS-B                                                                            | Item Reliability- ECLS-B   |
|---------------------------------|---------------------------------------------------------------------------------------------------------------|----------------------------------------------------------------------------------------------------------------------------------------------------------------------------------------------------------------------------------------------------------------|-----------------------------|--------------------------------------------------------------------------------------------------|----------------------------|
| Self-Regulation Problems        | Problems with intrapersonal and interpersonal functioning, including affect regulation and social interaction | <i>When upset, can your child calm down within a half hour?</i><br>– For children aged 3-13 months<br><br><i>Can your child move from one activity to the next with little difficulty, such as from playtime to mealtime?</i> – For children aged 42-53 months | .84 <sup>a</sup> (77 items) | N/A                                                                                              | N/A                        |
| Attention-deficit/Hyperactivity | Attentional and regulatory problems                                                                           | N/A                                                                                                                                                                                                                                                            | N/A                         | <i>My child pays attention well.</i><br><i>My child is overly active or unable to sit still.</i> | .66 <sup>b</sup> (3 items) |
| Internalizing <sup>c</sup>      | Problem behaviors that are directed inward or at self                                                         | <i>Sudden changes in mood or feelings;</i><br><i>Too fearful or anxious</i><br><i>Shows little interest in things around him/her</i>                                                                                                                           | .78 <sup>b</sup> (36 items) | <i>My child seems unhappy.</i><br><i>My child worries about things.</i>                          | .47 <sup>b</sup> (2 items) |

LINKS BETWEEN *P* AND *G* FACTORS

42

---

|                            |                                                                                                     |                                                 |                             |                                                                                                               |                            |
|----------------------------|-----------------------------------------------------------------------------------------------------|-------------------------------------------------|-----------------------------|---------------------------------------------------------------------------------------------------------------|----------------------------|
| Externalizing <sup>c</sup> | Problem behaviors that are directed outward or potentially affect others in the child's environment | <i>Disobedient;</i><br><i>Easily frustrated</i> | .88 <sup>b</sup> (24 items) | <i>My child gets angry.</i><br><i>My child is physically aggressive, for example, hits, kicks, or pushes.</i> | .79 <sup>b</sup> (5 items) |
|----------------------------|-----------------------------------------------------------------------------------------------------|-------------------------------------------------|-----------------------------|---------------------------------------------------------------------------------------------------------------|----------------------------|

---

*Note.* <sup>a</sup> 1PL Item Response Theory (IRT) item reliability estimate scaled to the minimum number of items administered using the Spearman Brown formula, with number of items analyzed followed in parentheses. <sup>b</sup> Reliability obtained using Cronbach's alpha. <sup>c</sup> All items on the Child Behavior Checklist are appropriate for children aged 1.5-5 years.

LINKS BETWEEN *P* AND *G* FACTORS

Table S3  
*Model Fit Indices and Comparisons*

| Model                                                                                                                     | AIC             | BIC             | RMSEA       | CFI         | Model Fit Comparisons                                                                                            |
|---------------------------------------------------------------------------------------------------------------------------|-----------------|-----------------|-------------|-------------|------------------------------------------------------------------------------------------------------------------|
| Model 1: sample-specific <i>ACE</i> correlations and <i>ACE</i> loadings                                                  | 72124.73        | 72663.70        | .029        | .978        | Model 1 vs. 2:<br>$\Delta\chi^2(3) = 1.86, p = .602$                                                             |
| <b>Model 2: sample-specific <i>ACE</i> loadings; averaged <i>ACE</i> correlations</b>                                     | <b>72122.31</b> | <b>72644.44</b> | <b>.029</b> | <b>.979</b> | Model 2 vs. 3a:<br>$\Delta\chi^2(3) = 10.75, p = .013$<br>Model 2 vs. 3b:<br>$\Delta\chi^2(3) = 14.78, p = .002$ |
| Model 3a: sample-specific <i>g</i> <i>ACE</i> loadings; averaged <i>ACE</i> correlations and <i>p</i> <i>ACE</i> loadings | 72149.22        | 72654.50        | .030        | .977        | Model 1 vs. 3a:<br>$\Delta\chi^2(6) = 14.67, p = .022$                                                           |
| Model 3b: sample-specific <i>p</i> <i>ACE</i> loadings; averaged <i>ACE</i> correlations and <i>g</i> <i>ACE</i> loadings | 72162.06        | 72667.35        | .031        | .976        | Model 1 vs. 3b:<br>$\Delta\chi^2(6) = 19.69, p = .003$                                                           |

*Note.* Models differed only with respect to *p*- and *g*-factor *ACE* estimates and correlations. Indicator level *ACE*

estimates and indicator intercepts were always freely estimated within each sample (ECLS-B and TXtT).

Models were compared using Satorra-Bentler scaled chi-square difference tests. Model 2 is highlighted in **bold**

as it was the preferred model across AIC, BIC, and chi-square difference tests.

LINKS BETWEEN *P* AND *G* FACTORS

44

Table S4

*Unstandardized Parameter Estimates from Age Moderation Models*

| Parameter                                                  | Centered at 3<br>years | Centered at 6<br>years |
|------------------------------------------------------------|------------------------|------------------------|
| <b><i>p</i>-Factor</b>                                     |                        |                        |
| <b>ECLS-B</b>                                              |                        |                        |
| Genetic Main Effect ( $a_p$ )                              | .79 (.08)***           | .77 (.09)***           |
| Gene $\times$ Age Interaction ( $a_p'$ )                   | .01 (.04)              | .08 (.11)              |
| Shared Environment ( $c_p$ )                               | .01 (.14)              | .29 (.19)              |
| Shared Environment $\times$ Age Interaction ( $c_p'$ )     | .05 (.08)              | -.09 (.15)             |
| Non-shared Environment ( $e_p$ )                           | .53 (.11)***           | .40 (.09)***           |
| Non-shared Environment $\times$ Age Interaction ( $e_p'$ ) | -.04 (.05)             | -.07 (.06)             |
| <b>TXtT</b>                                                |                        |                        |
| Genetic Main Effect ( $a_p$ )                              | .55 (.09)***           | .69 (.25)**            |
| Gene $\times$ Age Interaction ( $a_p'$ )                   | .03 (.06)              | .02 (.10)              |
| Shared Environment ( $c_p$ )                               | .54 (.09)***           | .76 (.45)              |
| Shared Environment $\times$ Age Interaction ( $c_p'$ )     | .08 (.07)              | .10 (.19)              |
| Non-shared Environment ( $e_p$ )                           | .19 (.06)**            | .25 (.14)              |
| Non-shared Environment $\times$ Age Interaction ( $e_p'$ ) | .03 (.04)              | .03 (.04)              |
| <b><i>g</i>-Factor</b>                                     |                        |                        |
| <b>ECLS-B</b>                                              |                        |                        |
| Genetic Effect ( $a_g$ )                                   | .29 (.09)**            | .69 (.06)***           |
| Gene $\times$ Age Interaction ( $a_g'$ )                   | .13 (.04)**            | .13 (.05)**            |
| Shared Environment ( $c_g$ )                               | .80 (.08)***           | .65 (.08)***           |
| Shared Environment $\times$ Age Interaction ( $c_g'$ )     | -.05 (.04)             | -.05 (.05)             |
| Non-shared Environment ( $e_g$ )                           | .22 (.05)***           | .19 (.04)***           |
| Non-shared Environment $\times$ Age Interaction ( $e_g'$ ) | -.01 (.03)             | -.01 (.03)             |
| <b>TXtT</b>                                                |                        |                        |
| Genetic Effect ( $a_g$ )                                   | .39 (.08)***           | 1.12 (.25)***          |
| Gene $\times$ Age Interaction ( $a_g'$ )                   | .23 (.08)**            | .24 (.07)**            |
| Shared Environment ( $c_g$ )                               | .47 (.12)***           | -.05 (.47)             |
| Shared Environment $\times$ Age Interaction ( $c_g'$ )     | -.10 (.08)             | .13 (.11)              |
| Non-shared Environment ( $e_g$ )                           | .16 (.03)***           | .05 (.07)              |
| Non-shared Environment $\times$ Age Interaction ( $e_g'$ ) | -.04 (.02)             | -.04 (.02)             |
| <b>ACE Correlations</b>                                    |                        |                        |
| Genetic ( $r_A$ )                                          | -.41 (.19)*            | -.31 (.14)*            |
| Age moderation of $r_A$ ( $r_A'$ )                         | .09 (.09)              | .07 (.07)              |
| Shared Environment ( $r_C$ )                               | -.49 (.22)*            | -.23 (.45)             |
| Age moderation of $r_C$ ( $r_C'$ )                         | -.27 (.18)             | -.12 (.27)             |
| Non-shared Environment ( $r_E$ )                           | -.21 (.18)             | -.10 (.21)             |
| Age moderation of $r_E$ ( $r_E'$ )                         | .22 (.11)*             | .06 (.51)              |

*Note.* Parameters reported are unstandardized path estimates. Standard errors are given in parentheses. ACE correlations were constrained to be equal across

LINKS BETWEEN *P* AND *G* FACTORS

45

*studies, while ACE factor loadings and their interaction terms with age were freely estimated within ECLS-B and TXtT. \*\*\* significantly different than zero at  $p < .001$ ; \*\*  $p < .01$ ; \*  $p < .05$ .*
